# Supplementary material for: Amino group dependent sensing properties of metal–organic frameworks: selective turn-on fluorescence detection of lysine and arginine
Source: Royal Society of Chemistry journal article supplement (doi:10.1039/d0ra06879a), 2020-01-01
Supplement: d0ra06879a1.pdf [file d0ra06879a1.pdf]

## Electronic supplementary information (ESI)

### Amino group dependent sensing property of metal-organic frameworks: Selective turn-on fluorescent detection of lysine and arginine

Jing Dong,<sup>a,b</sup> Xiu-Du Zhang,<sup>a</sup> Xia-Fei Xie,<sup>a</sup> Fan Guo<sup>a</sup> and Wei-Yin Sun<sup>\*a</sup>

<sup>a</sup> Coordination Chemistry Institute, State Key Laboratory of Coordination Chemistry, School of Chemistry and Chemical Engineering, Nanjing National Laboratory of Microstructures, Collaborative Innovation Center of Advanced Microstructures, Nanjing University, Nanjing 210023, China

<sup>b</sup> Nanjing Tech University, Nanjing 211816, China

\* Corresponding author.

Email address: sunwy@nju.edu.cn (W. Y. Sun).

**Table S1.** Comparison of the sensing performance of some reported fluorescent turn-on sensors towards Lysine

| Probes                                                | Solvent                                       | Linear range (mM) | K (M <sup>-1</sup> )  | LOD (μM) | Reference |
|-------------------------------------------------------|-----------------------------------------------|-------------------|-----------------------|----------|-----------|
| UiO-66-NH <sub>2</sub>                                | H <sub>2</sub> O                              | 0-3.475           | 1.81×10 <sup>3</sup>  | 60.22    | This work |
| GQD/AuNPs                                             | H <sub>2</sub> O/PBS                          | 0.047-0.8         | /                     | 16.14    | S1        |
| Pyrylium salt                                         | CH <sub>3</sub> CN/H <sub>2</sub> O           | /                 | /                     | 36.1     | S2        |
| 8-hydroxypyrene-1,3,6-trisulfonic acid trisodium salt | H <sub>2</sub> O                              | 0-0.045           | /                     | 3.106    | S3        |
| GO-Al-AR                                              | H <sub>2</sub> O                              | 0.171-1.71        | 3.861×10 <sup>3</sup> | 13.68    | S4        |
| Pyridinium-Urea-Coupled Polyether                     | CH <sub>3</sub> CN/H <sub>2</sub> O/H<br>EPES | /                 | 1.06×10 <sup>3</sup>  | 25       | S5        |
| CuNCs                                                 | H <sub>2</sub> O/HAc-NaAc                     | 0.01-1.0          | 1.098×10 <sup>3</sup> | 5.5      | S6        |
| Chiral carbon dots                                    | H <sub>2</sub> O/DHP-CA                       | 0-1.0             | 93.866                | 3.44     | S7        |
| Cd-TCOOH                                              | H <sub>2</sub> O/HEPES                        | 0-0.14            | /                     | 4        | S8        |

**Table S2.** Comparison of the sensing performance of some reported fluorescent turn-on sensors towards Arginine

| Probes                                                            | Solvent              | Linear range (mM) | K (M <sup>-1</sup> )  | LOD (μM) | Reference |
|-------------------------------------------------------------------|----------------------|-------------------|-----------------------|----------|-----------|
| UiO-66-NH <sub>2</sub>                                            | H <sub>2</sub> O     | 0-0.645           | 8.03×10 <sub>3</sub>  | 21.50    | This work |
| 8-hydroxypyrene-1,3,6-trisulfonic acid trisodium salt             | H <sub>2</sub> O     | 0-0.045           | /                     | 1.941    | S3        |
| hydroxyphenylbenzothiazole (HBT)-based fluorescent probe (HBT-Py) | DMSO                 | /                 | /                     | 2.24     | S9        |
| GSH-Ag NCs                                                        | AA/H <sub>2</sub> O  | 0.01–0.18         | /                     | 0.5      | S10       |
| 1,3,6,8-Tetrakis(p-benzoic acid)pyrene (TBAPy)                    | H <sub>2</sub> O     | 0–0.2             | 6.8 ×10 <sub>5</sub>  | 2.3      | S11       |
| polydiacetylene vesicles (PDAs)-Mg <sup>2+</sup>                  | H <sub>2</sub> O     | 0-0.15            | 9.1×10 <sub>4</sub>   | 4.27     | S12       |
| (UO <sub>2</sub> )(nip)(2,2'-bpy)                                 | H <sub>2</sub> O     | 0-0.22            | 3.46×10 <sub>3</sub>  | 1.06     | S13       |
| dual-emission carbon dots (CDs)                                   | H <sub>2</sub> O     | 0.027-0.107       | 9.91×10 <sub>3</sub>  | 9.16     | S14       |
| Au/CQDs composite                                                 | H <sub>2</sub> O/PBS | 0.001–0.005       | 6.864×10 <sub>6</sub> | 0.45     | S15       |

**Table S3.** Chemical shifts of Lys and Arg in DCl/DMSO-*d*<sub>6</sub>, UiO-66-NH<sub>2</sub> digested in HF/DMSO-*d*<sub>6</sub> before and after the immersion in the solution of Lys and Arg.

|                              | $\delta(\text{ppm})$                                                                                                                              |
|------------------------------|---------------------------------------------------------------------------------------------------------------------------------------------------|
| UiO-66-NH <sub>2</sub>       | 8.05 (s), 7.86 (s), 7.79 (d), 7.36 (d), 7.08 (dd), 2.86 (s), 2.71 (s), 2.10 (s), 1.88 (s)                                                         |
| Lys                          | 8.60 (d), 8.19 (s), 3.80 (t), 2.70 (t), 1.77 (q), 1.52-1.58 (m), 1.39-1.47 (m), 1.28-1.37 (m)                                                     |
| UiO-66-NH <sub>2</sub> + Lys | 8.05 (s), 7.79 (d), 7.55 (br), 7.36 (d), 7.10 (dd), 3.80 (s), 2.74-2.80 (m), 2.10 (s), 1.71-1.84 (m), 1.52-1.58 (m), 1.38-1.46 (m), 1.29-1.37 (m) |
| Arg                          | 3.76 (t), 3.03 (s), 1.72 (d), 1.33-1.57 (m)                                                                                                       |
| UiO-66-NH <sub>2</sub> + Arg | 8.06 (s), 7.79 (d), 7.35 (d), 7.09 (dd), 6.70 (br), 3.83 (t), 3.10 (q), 2.10 (s), 1.74-1.87 (m), 1.47-1.66 (m)                                    |

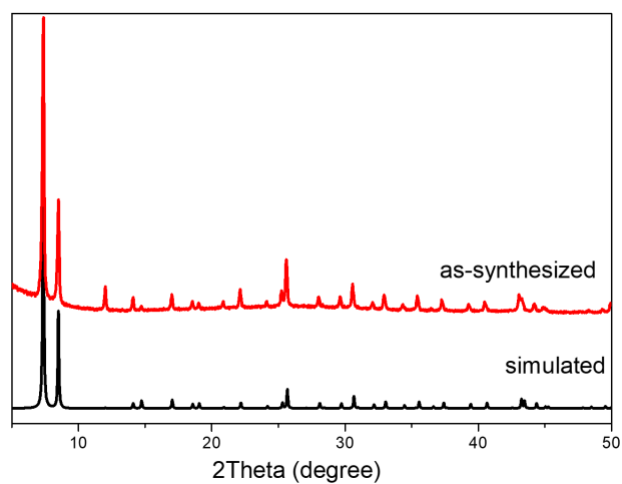

**Fig. S1** PXRD patterns of UiO-66-NH<sub>2</sub>.

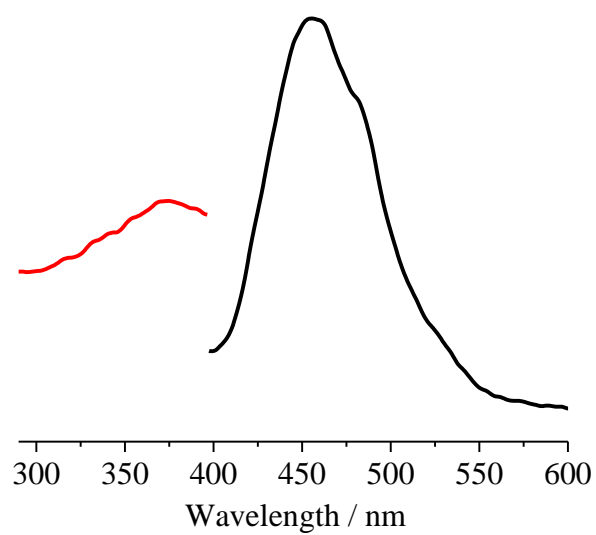

(a)

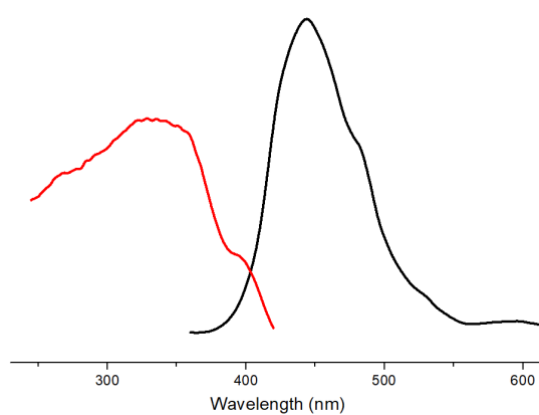

(b)

**Fig. S2.** The fluorescence excitation and emission spectra of UiO-66-NH<sub>2</sub> in the solid state (a) and the aqueous suspension (b).

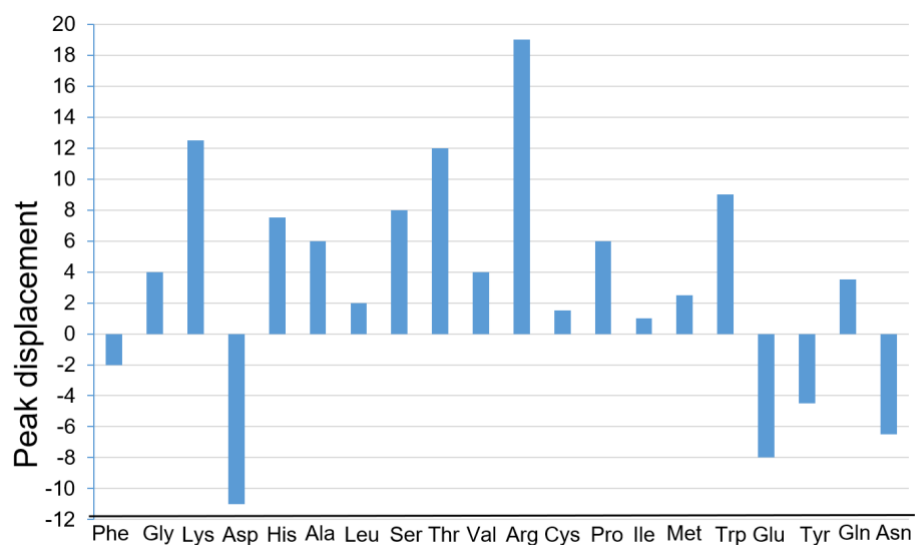

**Fig. S3.** The maxima wavelength shift of the suspension of UiO-66-NH<sub>2</sub> upon the addition of AAs, positive value refers blue-shift (nm) and negative value presents red-shift (nm).

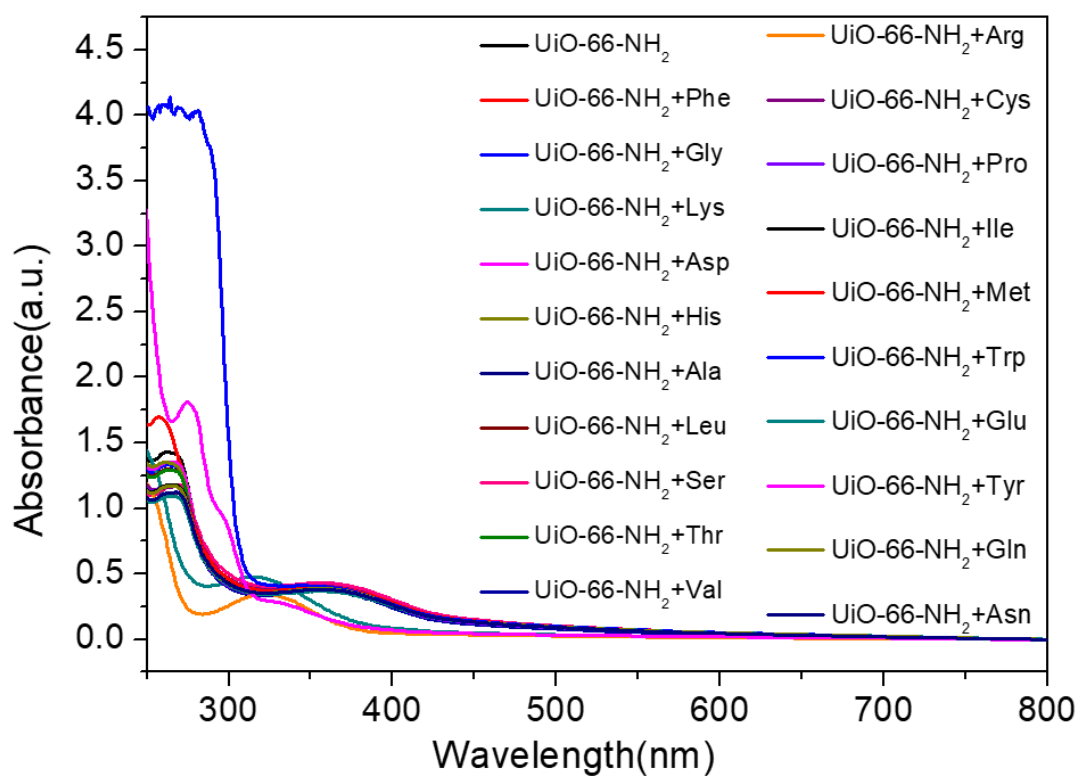

**Fig. S4.** UV-Vis spectra of the suspension of UiO-66-NH<sub>2</sub> with different AAs.

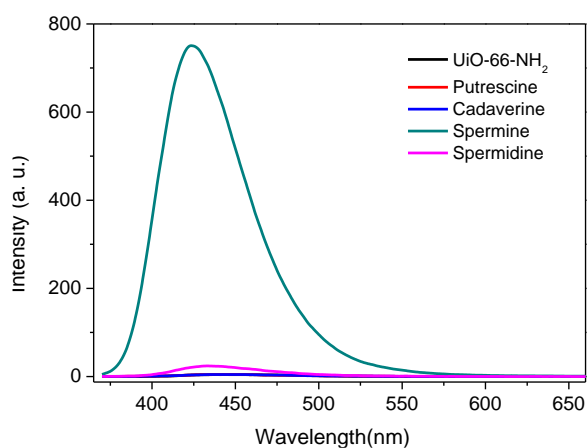

**Fig. S5.** The fluorescence emission curves of the aqueous suspension of UiO-66-NH<sub>2</sub> in the absence and presence of different amines.

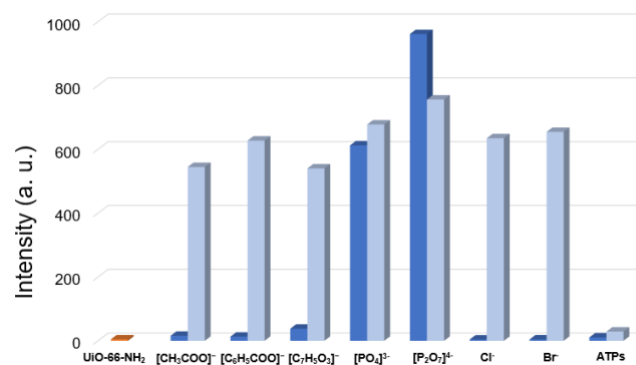

(a)

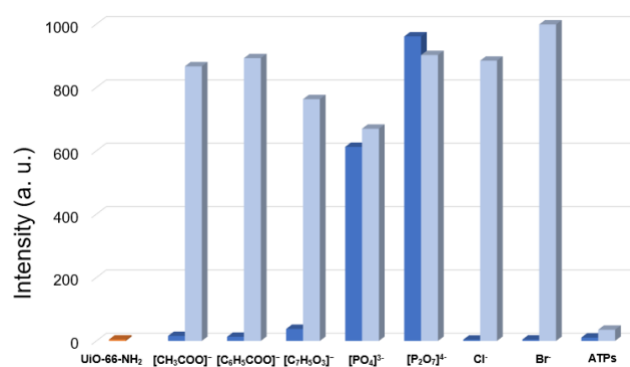

(b)

**Fig. S6.** Maximum fluorescence intensities of the aqueous suspension of UiO-66-NH<sub>2</sub> by the sequential addition of sodium salt different anions and Lys (a)/Arg (b).

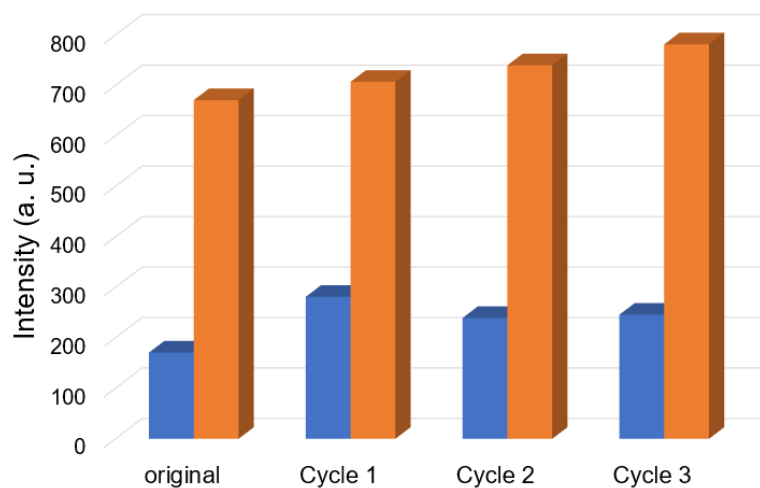

(a)

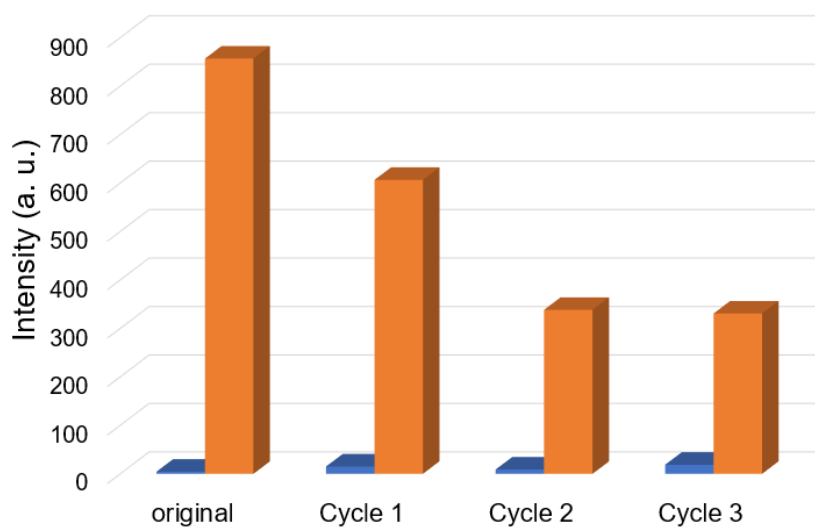

(b)

**Fig. S7.** Fluorescence enhancement and repeatability tests for Lys (a) and Arg (b).



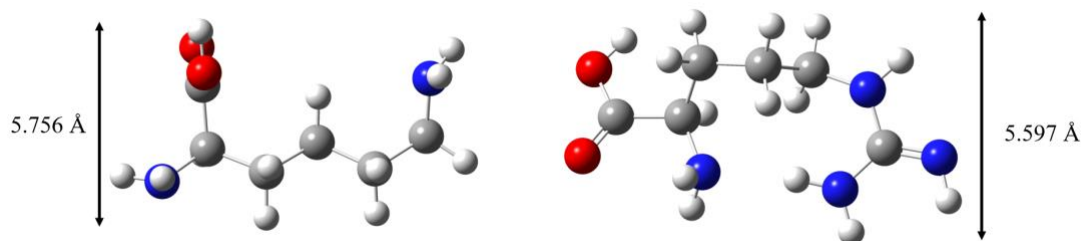

**Fig. S8.** The longitudinal size of Lys and Arg based on the calculation on Gaussian 09 with b3lyp/6-31g basis sets. The reported internal pore of UiO-66-NH<sub>2</sub> is accessible for guest molecules through triangular windows with size of about 6 Å.

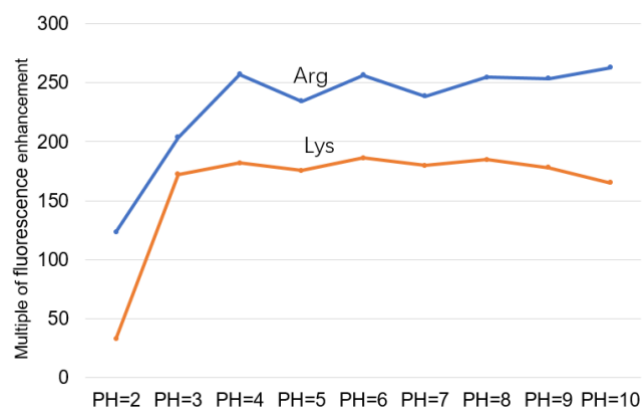

**Fig. S9.** The emission intensity increments at the maximum wavelength upon the addition of the solution of Lys/Arg (0.5 mL, 0.1 mM) into the suspension of UiO-66-NH<sub>2</sub> (2 mL) under different pH.

## References

- S1 C. Chaicham, T. Tuntulani, V. Promarak, B. Tomapatnanaget, *Sens. Actuators B: Chem.*, 2019, **282**, 936-944.
- S2 X. Qian, W. Gong, F. Wang, Y. Lin, G. Ning, *Tetrahedron Lett.*, 2015, **56**, 2764-2767.
- S3 R. S. Bhosale, G. V. Shitre, R. Kumar, D. O. Biradar, S. V. Bhosale, R. Narayan, S. V. Bhosale, *Sens. Actuators B: Chem.*, 2017, **241**, 1270-1275.
- S4 R. Cheng, H. Huang, Y. Peng, C. Ge, S. Ou, Y. Bu, Y. Xue, H. Liu, L. Dai, *Microchim. Acta*, 2017, **184**, 3521-3528.
- S5 K. Ghosh, D. Tarafdar, I. D. Petsalakis, G. Theodorakopoulos, *Eur. J. Org. Chem.*, 2017, **2017**, 355-362.
- S6 M. Zhang, J. Qiao, S. Zhang, L. Qi, *Talanta*, 2018, **182**, 595-599.
- S7 P. Gao, Z. Xie, M. Zheng, *Sens. Actuators B: Chem.*, 2020, **319**, 128265.
- S8 Y. Liu, M. Huangfu, P. Wu, M. Jiang, X. Zhao, L. Liang, L. Xie, J. Bai, J. Wang, *Dalton Trans.*, 2019, **48**, 13834-13840.
- S9 S. W. Zhang, D. D. Wu, X. Jiang, F. Xie, X. D. Jia, X. L. Song, Y. Yuan, *Sens. Actuator B: Chem.*, 2019, **290**, 691-697.
- S10 N. Li, Y. He, Y. Ge, G. Song, *J. Fluoresc.*, 2017, **27**, 293-302.
- S11 J. S. Hao, M. Wang, S. T. Wang, Y. Huang, D. P. Cao, *Dyes Pigment.*, 2020, **175**, 108131.
- S12 Z. J. Zhang, T. W. Wei, Y. H. Chen, T. T. Chen, B. Chi, F. Wang, X. Q. Chen, *Sens. Actuator B: Chem.*, 2018, **255**, 2211-2217.
- S13 L. Wang, B. Tu, W. Xu, Y. Fu, Y. Zheng, *Inorg. Chem.*, 2020, **59**, 5004-5017.
- S14 Y. Y. Wang, H. X. Liu, H. H. Song, M. M. Yu, L. H. Wei, Z. X. Li, *New J. Chem.*, 2019, **43**, 13234-13239.
- S15 T. Liu, N. Li, J. X. Dong, Y. Zhang, Y. Z. Fan, S. M. Lin, H. Q. Luo, N. B. Li, *Biosens. Bioelectron.*, 2017, **87**, 772-778.
